# Supplementary material for: Promoting Evidence Based Nutrition Education Across the World in a Competitive Space: Delivering a Massive Open Online Course
Source: MDPI journal article supplement (doi:10.3390/nu12020344), 2020-01-28
Supplement: s1 [file s1]

**Table S1.** Course Outline.

| Week                                            | Theme                                    | Topic/Content                                                                                                         | Delivery Mode                                                |
|-------------------------------------------------|------------------------------------------|-----------------------------------------------------------------------------------------------------------------------|--------------------------------------------------------------|
| 1: Food as Medicine                             | Introduction                             | Welcome to the Course<br>Course Philosophy                                                                            | Videos and written articles                                  |
|                                                 | History of Food as Medicine              | Food as Medicine in History                                                                                           | Videos and written articles                                  |
|                                                 |                                          | Importance of evidence                                                                                                | Article                                                      |
|                                                 | Food in Health and Disease               | The role food can play in prevention and treatment                                                                    | Videos and written articles                                  |
|                                                 |                                          | How many different foods you consume everyday?                                                                        | Activity                                                     |
|                                                 | What's in food that makes it special?    | Food matrix, macro and micronutrients, phytochemicals, using supplements                                              | Videos and written articles                                  |
|                                                 |                                          | Superfoods Quiz                                                                                                       | Quiz                                                         |
|                                                 |                                          | Superfoods: Myth or Real                                                                                              | Activity and discussion                                      |
|                                                 | Foods and Inflammation                   | Acute and chronic inflammation<br>Foods and inflammation                                                              | Videos and written articles                                  |
|                                                 | Weekly feedback                          |                                                                                                                       | Video                                                        |
| 2: A Body System's Approach to Food as Medicine | Food and the Gut                         | Prebiotics, probiotics, fibre, FODMAPS                                                                                | Videos and written articles                                  |
|                                                 | Food and the Brain                       | Food and appetite<br>Food addiction                                                                                   | Videos, written articles and surveys                         |
|                                                 | Food and our Genome                      | What are genes and why are they important for our health?<br>Food, nutrition and our genome                           | Videos, written articles, quiz and discussion points         |
|                                                 | Food, Fertility and Pregnancy            | Nutrition and fertility, pregnancy and total energy intake                                                            | Videos, written articles, quiz, survey and discussion points |
|                                                 | Food and Weight                          | Classifying weight and BMI, weight regain, complexity of achieving healthy weight, diets                              | Videos and written articles                                  |
|                                                 | Weekly feedback                          |                                                                                                                       | Video                                                        |
| 3: Interpreting the Science of Food as Medicine | Nutrition Complexities and Controversies | Factors influencing what we eat, evolution of nutrition science, how misinformation can end up as fact, popular diets | Videos, written articles, discussions and activity           |
|                                                 | Making Choices: Foods and Diet           | The challenges with portion sizes, local and international dietary guidelines                                         | Videos, written articles, quiz and discussions               |
|                                                 | Who Can you Trust                        | Nutrition Information- what to look out for?                                                                          | Video                                                        |
|                                                 |                                          | Evidence and nutrition advice                                                                                         | Activity                                                     |
|                                                 | Where is the future heading?             | Functional foods, personalized medicine                                                                               | Videos, written articles and discussions                     |
|                                                 | Weekly Feedback                          |                                                                                                                       | Video                                                        |
|                                                 | End of course                            | End of course discussion                                                                                              | Discussion                                                   |
|                                                 |                                          | Supporting information                                                                                                | Article                                                      |

**Table S2.** Qualitative Research Review Guidelines (RATS) checklist.

| Qualitative Research Review Guidelines – RATS <sup>1</sup>                    |                                                                                                            |                               |
|-------------------------------------------------------------------------------|------------------------------------------------------------------------------------------------------------|-------------------------------|
| Ask this of the manuscript                                                    | This should be included in the manuscript                                                                  | Where item has been addressed |
| R – Relevance of study design                                                 |                                                                                                            |                               |
| Is research question interesting?                                             | Research question explicitly stated                                                                        | P2 (end of introduction)      |
| Is research question relevant to clinical practice, public health, or policy? | Research question justified and linked to the existing knowledge base (empirical research, theory, policy) | P1-2                          |
| A – Appropriateness of qualitative method                                     |                                                                                                            |                               |
| Is qualitative methodology the best approach for the study aims?              | Study design described and justified e.g., why was a particular method (i.e., interviews) chosen?          | P2-3                          |
| <i>Interviews:</i> experience, perceptions, behavior, practice, process       |                                                                                                            |                               |
| <i>Focus groups:</i> group dynamics, convenience, non-sensitive topics        |                                                                                                            |                               |
| <i>Ethnography:</i> culture, organizational behavior, interaction             |                                                                                                            |                               |
| <i>Textual analysis:</i> documents, art, representations, conversations       |                                                                                                            |                               |
| T – transparency of procedures                                                |                                                                                                            |                               |
|                                                                               |                                                                                                            | P3                            |

|                                                                                                                    |                                                                                                                                                                                      |        |
|--------------------------------------------------------------------------------------------------------------------|--------------------------------------------------------------------------------------------------------------------------------------------------------------------------------------|--------|
| <i>Sampling</i>                                                                                                    |                                                                                                                                                                                      |        |
| Are the participants selected the most appropriate to provide access to the type of knowledge sought by the study? | Criteria for selecting the study sample justified and explained<br><br><i>theoretical</i> : based on pre conceived or emergent theory<br><br><i>purposive</i> : diversity of opinion |        |
| Is the sampling strategy appropriate?                                                                              | <i>volunteer</i> : feasibility, hard-to-reach groups                                                                                                                                 |        |
| <i>Recruitment</i>                                                                                                 |                                                                                                                                                                                      |        |
| Was recruitment conducted using appropriate methods?                                                               | Details of how recruitment was conducted and by whom                                                                                                                                 | P3     |
| Is the sampling strategy appropriate?                                                                              | Details of who chose not to participate and why                                                                                                                                      | P3     |
| Could there be selection bias?                                                                                     |                                                                                                                                                                                      |        |
| <i>Data collection</i>                                                                                             |                                                                                                                                                                                      |        |
| Was collection of data systematic and comprehensive?                                                               | Method (s) outlined and examples given (e.g., interview questions)                                                                                                                   | P3     |
| Are characteristics of study group and setting clear?                                                              | Study group and setting clearly described                                                                                                                                            | P3     |
| Why and when was data collection stopped, and is this reasonable?                                                  | End of data collection justified and described                                                                                                                                       | Page 3 |
| <i>Role of researchers</i>                                                                                         |                                                                                                                                                                                      |        |
| Is the researcher(s) appropriate?                                                                                  | Do the researchers occupy dual roles (clinician and researcher)?                                                                                                                     | Page 3 |

|                                                                               |                                                                                                                                                                                 |        |
|-------------------------------------------------------------------------------|---------------------------------------------------------------------------------------------------------------------------------------------------------------------------------|--------|
| How might they bias (good and bad) the conduct of the study and results?      | Are the ethics of this discussed? Do the researcher(s) critically examine their own influence on the formulation of the research question, data collection, and interpretation? | Page 3 |
| <i>Ethics</i><br>Was informed consent sought and granted?                     | Informed consent process explicitly and clearly detailed                                                                                                                        | Page 3 |
| Were participants' anonymity and confidentiality ensured?                     | Anonymity and confidentiality discussed                                                                                                                                         | Page 8 |
| Was approval from an appropriate ethics committee received?                   | Ethics approval cited                                                                                                                                                           | Page 8 |
| <hr/> S - Soundness of interpretive approach <hr/>                            |                                                                                                                                                                                 |        |
| <i>Analysis</i><br>Is the type of analysis appropriate for the type of study? | Analytic approach described in depth and justified                                                                                                                              | Page 3 |
| <i>Thematic</i> : exploratory, descriptive, hypothesis generating             | Indicators of quality: Description of how themes were developed from the data (inductive or deductive)                                                                          | Page 3 |
| <i>Framework</i> : e.g. policy                                                |                                                                                                                                                                                 | Page 3 |
| <i>Constant comparison/grounded theory</i> : theory generating, analytical    | Evidence of alternative explanations being sought<br><br>Analysis and presentation of negative or deviant cases<br><br>Description of the basis on which quotes were chosen     |        |

|                                                                                     |                                                                                                                              |           |
|-------------------------------------------------------------------------------------|------------------------------------------------------------------------------------------------------------------------------|-----------|
| Are the interpretations clearly presented and adequately supported by the evidence? | Semi-quantification when appropriate                                                                                         | Pages 4-5 |
| Are quotes used and are these appropriate and effective?                            | Illumination of context and/or meaning, richly detailed                                                                      | Pages 4-5 |
| Was trustworthiness/reliability of the data and interpretations checked?            | Method of reliability check described and justified<br>e.g., was an audit trail, triangulation, or member checking employed? | Page 3    |
|                                                                                     | Did an independent analyst review data and contest themes? How were disagreements resolved?                                  |           |
| <hr/>                                                                               |                                                                                                                              |           |
| <i>Discussion and presentation</i>                                                  | Findings presented with reference to existing                                                                                | Pages 7-9 |
| Are findings sufficiently grounded in a theoretical or conceptual framework?        | theoretical and empirical literature, and how they contribute                                                                |           |
| Is adequate account taken of previous knowledge and how the findings add?           | Strengths and limitations explicitly described and discussed                                                                 | Pages 7-9 |
| Are the limitations thoughtfully considered?                                        |                                                                                                                              | Page 9    |

---

|                                                                                                                                           |                                                                                                                                                             |            |
|-------------------------------------------------------------------------------------------------------------------------------------------|-------------------------------------------------------------------------------------------------------------------------------------------------------------|------------|
| Is the manuscript well written and accessible?                                                                                            | Evidence following guidelines (format, word count)                                                                                                          | Title page |
|                                                                                                                                           | Detail of methods or additional quotes, contained in appendix                                                                                               | No         |
|                                                                                                                                           | Written for a health sciences audience                                                                                                                      | Yes        |
| Are red flags present?                                                                                                                    | Grounded theory; not a simple content analysis but a complex, sociological, theory generating approach                                                      | -          |
| These are common features of ill-conceived or poorly executed qualitative studies, are a cause for concern, and must be viewed critically | <i>Jargon</i> : descriptions that are trite or jargon filled should be viewed skeptically                                                                   |            |
| They might be fatal flaws, or they may result from lack of detail or clarity                                                              | <i>Over interpretation</i> : interpretation must be grounded in "accounts" and semi-quantified if possible or appropriate                                   |            |
|                                                                                                                                           | <i>Seems anecdotal, self-evident</i> : may be a superficial analysis, not rooted in conceptual framework or linked to previous knowledge, and lacking depth |            |
|                                                                                                                                           | <i>Consent process thinly discussed</i> : may not have met ethics requirements                                                                              |            |

---

*Doctor-researcher:* consider  
the ethical implications for  
patients and the bias in data  
collection and interpretation

---

<sup>1</sup> The RATS guidelines modified for BioMed Central are copyright Jocalyn Clark, BMJ. They can be found in Clark JP: How to peer review a qualitative manuscript. In *Peer Review Health Sciences*. Second edition. Edited by Godlee F, Jefferson T. London: BMJ Books; 2003:219-235.
